# Supplementary material
Source: MDPI journal article supplement (https://www.mdpi.com/2073-4433/9/10/376)
Supplement: s1 [file s1]

This file contains the interannual variability of the latent heat flux and the net radiation flux at the surface

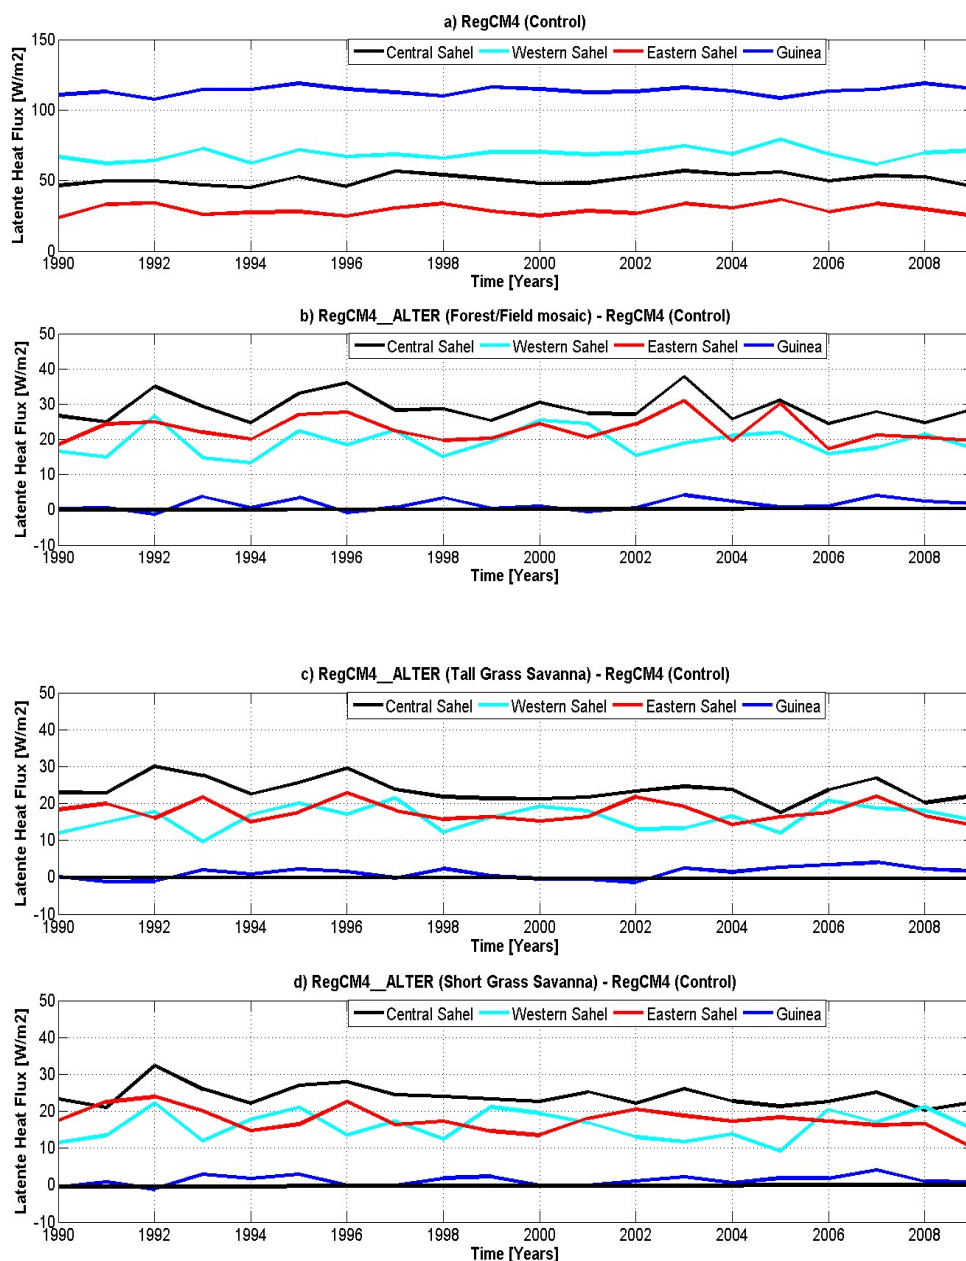

**Figure S1.** Interannual variability of JJAS latent heat flux for: (a) RegCM4 (control), (b) RegCM4 ALTER (Forest/Field mosaic)—RegCM4 (control), (c) RegCM4 ALTER (Tall grass savanna)—RegCM4 (control), and (d) RegCM4 ALTER (Short grass savanna)—RegCM4 (control) over the central Sahel, western Sahel, eastern Sahel and Guinea.

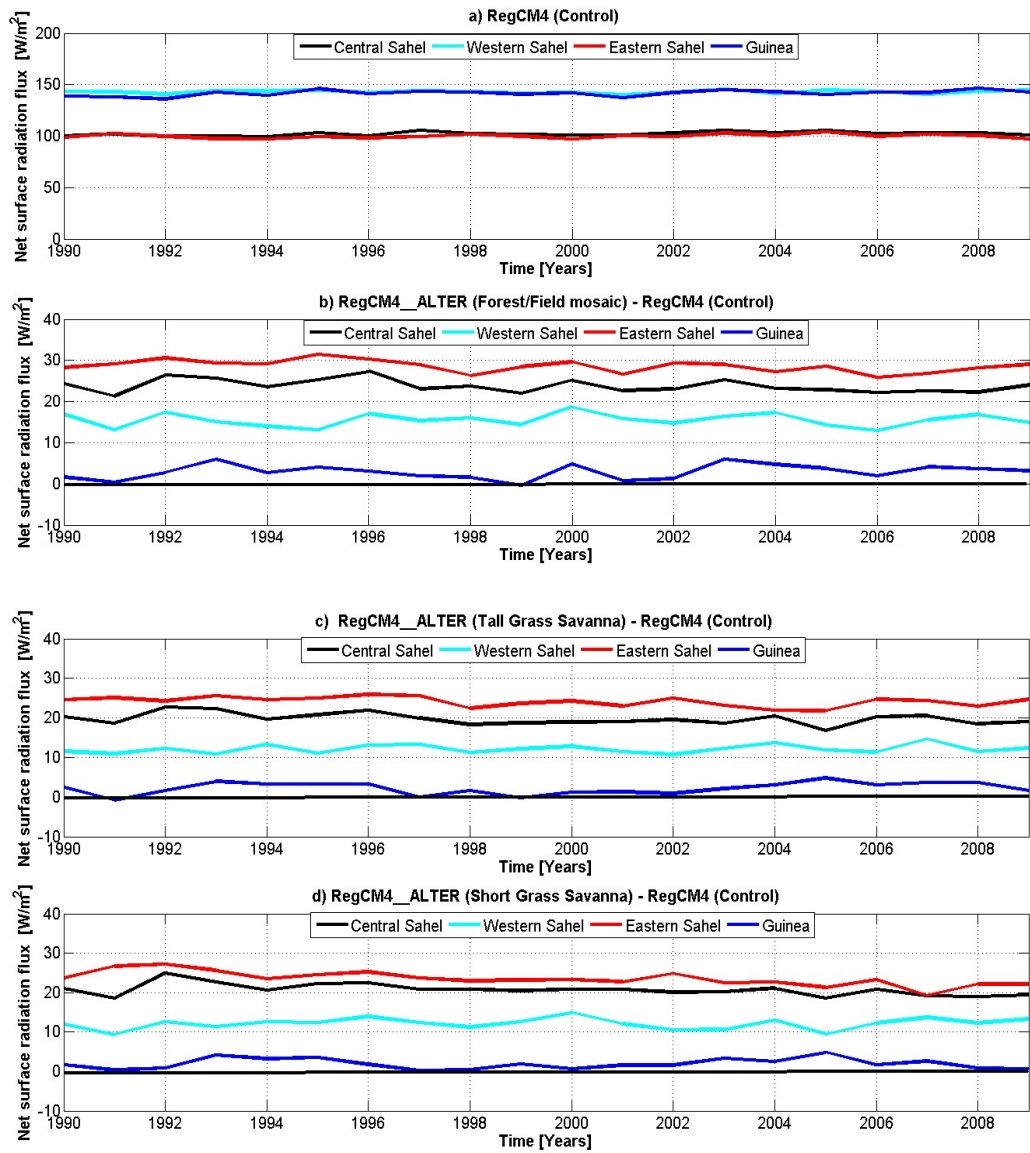

**Figure S2.** Net radiation flux at the surface ( $\text{W/m}^2$ ) for: (a) RegCM4 (control), (b) RegCM4 ALTER (Forest/Field mosaic)—RegCM4 (control), (c) RegCM4 ALTER (Tall grass savanna)—RegCM4 (control), and (d) RegCM4 ALTER (Short grass savanna)—RegCM4 (control) over the central Sahel, western Sahel, eastern Sahel and Guinea.
